# Supplementary material for: Relaxin-expressing oncolytic adenovirus induces remodeling of physical and immunological aspects of cold tumor to potentiate PD-1 blockade
Source: PubMed Central journal article supplement (PMC7406118; doi:10.1136/jitc-2020-000763), 2020-08-04
Supplement: jitc-2020-000763supp001.pdf [file jitc-2020-000763supp001.pdf]

Submitted Manuscript: Confidential

1 **Relaxin-expressing oncolytic adenovirus induces remodeling of physical and**  
2 **immunological aspects of cold tumor to potentiate PD-1 blockade**

3  
4 Bo-Kyeong Jung<sup>1†</sup>, Hae Young Ko<sup>2†</sup>, Hyun-ji Kang<sup>2</sup>, JinWoo Hong<sup>1,3</sup>, Hyo Min Ahn<sup>1,3</sup>, Youjin  
5 Na<sup>1</sup>, Hyeon-gi Kim<sup>2</sup>, Jin Su Kim<sup>2,4\*</sup>, Chae-Ok Yun<sup>1,3,5\*</sup>

6  
7 <sup>1</sup>Department of Bioengineering, College of Engineering, Hanyang University, 222 Wangsimni-  
8 ro, Seongdong-gu, Seoul 04763, Republic of Korea

9 <sup>2</sup>Division of Radiation Biomedical Research, Korea Institute of Radiological and Medical  
10 Sciences, 75 Nowon-ro, Nowon-gu, Seoul 01812, Republic of Korea

11 <sup>3</sup>GeneMedicine Co., Ltd., Fusion Technology Center (FTC), 222 Wangsimni-ro, Seongdong-gu,  
12 Seoul, 04763, Republic of Korea

13 <sup>4</sup>Radiological and Medico-Oncological Sciences, University of science and technology (UST),  
14 75 Nowon-ro, Nowon-gu, Seoul 01812, Republic of Korea

15 <sup>5</sup>Institute of Nano Science and Technology (INST), Hanyang University, 222 Wangsimni-ro,  
16 Seongdong-gu, Seoul 04763, Republic of Korea

17  
18 \*To whom correspondence should be addressed: Chae-Ok Yun; [chaeok@hanyang.ac.kr](mailto:chaeok@hanyang.ac.kr) and Jin  
19 Su Kim; [kjs@kiram.re.kr](mailto:kjs@kiram.re.kr).

20 †These authors contributed equally to this work.

## 1 **Supplemental Materials & Methods**

### 2 *RT-PCR analysis*

3 Total RNAs were extracted from Ad-infected NCI-N87 or HaP-T1 cell lysates using an  
4 RNA iso Plus kit (Takara, Otsu, Japan) according to the manufacturer's protocol. cDNA was  
5 prepared from 1 µg of total RNA with a High Capacity cDNA Reverse Transcription Kit  
6 (Applied Biosystems, Foster City, CA) under the following incubation conditions: 25°C for 10  
7 min, 37°C for 120 min, and 85°C for 5 min. The RLX sequence was amplified by PCR with the  
8 following primer set: 5'-CCTGGAGCAAAAGGTCTCTG-3' as the sense primer and 5'-  
9 TCTCAGATAGGGCTGCCTTC-3' as the antisense primer.

10

### 11 *Masson's trichrome staining and Safranin-O staining*

12 To investigate the expression of collagen in tumor tissues, Masson's trichrome (MT)  
13 staining was performed on sectioned tumor tissues using a MT staining kit (DAKO, Glostrup,  
14 Denmark) according to the manufacturer's protocol. To further investigate the side effects of  
15 oAd/RLX, oAd/RLX ( $2.5 \times 10^7$  VP) was administered intravenously on day 0, 2, and 4 to  
16 BALB/c nude mice. At 5 days after the first injection of virus, the articular cartilage in the knee  
17 joint was isolated from mice and the proteoglycan content assessed by Safranin-O staining  
18 according to the manufacturer's protocol.

19

### 20 *IL-12 and GM-CSF ELISA*

21 HaP-T1 cells were plated onto 6-well plates at  $2 \times 10^5$  cells per well, and then infected  
22 with oAd/IL12/GM-RLX at 0.2-5 MOI. At 48 hr post infection, the expression levels of IL-12  
23 and GM-CSF were quantified in culture supernatants using a mouse IL-12 p70 DuoSet ELISA

1 kit (R&D Systems, Minneapolis, MN) and a mouse GM-CSF DuoSet ELISA kit (R&D  
2 Systems), respectively, according to the manufacturer's recommendations. Serial dilutions of a  
3 known concentration of purified recombinant mouse IL-12 or GM-CSF were used to establish a  
4 standard curve.

5

#### 6 *Orthotopic pancreatic tumor model*

7 To establish the hamster orthotopic pancreatic tumor model, luciferase-expressing HP-1  
8 hamster pancreatic cancer cells ( $4 \times 10^5$ ) were injected directly into the tail of pancreas, and the  
9 establishment of the orthotopic pancreatic tumor model was confirmed by bioluminescence  
10 imaging. Hamsters were anesthetized in a chamber filled with 2% isoflurane in O<sub>2</sub> and received  
11 D-luciferin (150 mg/kg; Caliper, Hopkinton, MA) by intraperitoneal injection. Then, both  
12 photographic and luminescent images were attained from the anesthetized hamsters using the  
13 IVIS imaging system (Xenogen, Alameda, CA). When tumor establishment was confirmed,  
14 hamsters were randomized into four groups. The  $1 \times 10^9$  VP of oAd/IL12/GM-RLX was injected  
15 into the abdomen twice (day 4 and 6), followed by a single injection into the tumor (day 8). αPD-  
16 1 was injected intraperitoneally at 3-day intervals for 3 times (day 6, 9, 12). After 11 days after  
17 initial virus injection, the ascites was harvested using 10 mL syringe and luciferase images were  
18 obtained from various organ (heart, lung, liver, kidney, spleen, intestine, seminal vesicle, and  
19 prostate) and tumor to assess the therapeutic effect and metastasis.

20

#### 21 *Biodistribution*

22 When the HaP-T1 subcutaneous tumor volume had reach approximately 120-150 mm<sup>3</sup>,  
23 tumor-bearing hamsters were injected intratumorally with  $7 \times 10^7$  VP of oAd/IL12/GM-RLX

1 three times (day 0, 2, 4) with/without intraperitoneally administered 10 mg/kg of  $\alpha$ PD-1 three  
2 times (day 2, 5, 8), along with PBS as control. The liver, spleen, kidney, lung, heart, and tumor  
3 were harvested at 7- or 14-day post initial virus treatment, and genomic DNA was extracted from  
4 the tissues using the QIAamp DNA Mini Kit (Qiagen, Hilden, Germany) according to the  
5 manufacturer's recommendation. The copy number of viral genomes in each sample was  
6 measured by real-time quantitative PCR (Applied Biosystems, Forster City, CA) as previously  
7 reported [1].

8

#### 9 *In vivo toxicity*

10 To assess potential *in vivo* toxicity of each treatment group, hamsters were injected  
11 intratumorally with  $7 \times 10^7$  VP of oAd/IL12/GM-RLX three times (day 0, 2, 4) and/or  
12 intraperitoneally 10 mg/kg of  $\alpha$ PD-1 three times (day 2, 5, 8), along with PBS as control. The  
13 serum levels of blood urea nitrogen (BUN), creatinine, aspartate aminotransferase (AST), and  
14 alanine transaminase (ALT) was measured at 3 days after last treatment.

15

#### 16 *Dosimetry*

17 To assess the safety of  $^{64}\text{Cu}$ -TZB or oAd/RLX plus  $^{64}\text{Cu}$ -TZB, the effective doses in  
18 normal organs were calculated. To assess the therapeutic efficacy of  $^{64}\text{Cu}$ -TZB or oAd/RLX plus  
19  $^{64}\text{Cu}$ -TZB, the absorbed doses in tumor regions were calculated. The radiation dose per unit of  
20 administered activity (mSv/MBq), the effective dose in organs, and the absorbed dose for the  
21 tumor region on PET scans in the mouse were calculated using OLINDA/EXM software  
22 (OLINDA; Vanderbilt University, Nashville, TN). For the calculation of absorbed dose in  
23 tumors, the OLINDA sphere model was used. The tumor volume was calculated on PET data



1 with multiple slices of ROIs. The tumor mass was calculated with the assumption of 1 g/mL. X-  
2 ray CT data were used for the delineation of ROIs. ROIs were delineated in the brain, lung, liver,  
3 stomach, intestine, kidney, and tumor regions. The size of ROIs ranged from 0.0067 to 0.066  
4 cm<sup>2</sup>. After delineation of ROIs on X-ray CT scans, ROIs were copied to the <sup>64</sup>Cu-TZB PET data.

5 Time activity curves (TACs) were obtained for each organ. Decay-uncorrected TACs  
6 were derived and cumulative activity was obtained from the AUC for TACs. For each source  
7 organ, the residence time was calculated by dividing the cumulative activity by the total injected  
8 dose.

9 The absorbed S value for each tumor volume was calculated with scaling by mass. A non-linear  
10 fitting between the S value and the mass was used because linear interpolation could lead to the  
11 value of S being too large.

12

13 *Antitumor effect comparison of oncolytic adenoviruses expressing one, two, or three of RLX, IL-*  
14 *12, and/or GM-CSF*

15 An oncolytic Ad expressing RLX (oAd/RLX), IL-12 and GM-CSF-expressing oncolytic  
16 Ad (oAd/IL12/GM) and IL-12, GM-CSF, and RLX-expressing oncolytic Ad (oAd/IL12/GM-  
17 RLX) was used along with oAd control. The generation of oAd and oAd/IL12/GM has been  
18 previously reported [2]. For oAd/RLX constructs, the E3 shuttle vector containing the RLX  
19 expression cassette [3, 4] was incorporated to the modified Ad5 total vector by homologous  
20 recombination as previously described [5, 6]. The construction method of oAd/IL12/GM-RLX  
21 was described in Material & Method section of this manuscript. Pancreatic tumors were  
22 established subcutaneously on the right flank of Syrian golden hamsters by inoculating  $3 \times 10^6$   
23 HaP-T1 cells suspended in 50  $\mu$ L of Hank's balanced salt solution (Gibco-BRL, Grand Island,

1 NY). When the average tumor volume reached  $100 \text{ mm}^3$ ,  $1 \times 10^8$  VP of each virus was  
2 intratumorally administered to the tumor-bearing hamsters at day 0, 2, and 4. All treatments  
3 began when the average tumor volume was approximately  $100 \text{ mm}^3$ . Tumor growth was  
4 evaluated every day by taking measurements of the L and W of the tumor. Tumor volume was  
5 calculated using the following formula:  $\text{volume} = 0.523L(W)^2$ .

6

#### 7 *Quantification of IL-12, GM-CSF, and IFN- $\gamma$ in tumor tissues*

8 The tumor tissues were lysed in NP-40 buffer (ELPIS Biotech, Daejeon, Korea) with a  
9 proteinase inhibitor cocktail (Sigma, St. Louis, Mo). Homogenates were then centrifuged, and  
10 the supernatants were harvested. Total protein quantities were determined using a bicinchoninic  
11 acid protein assay reagent kit (Thermo Fisher Scientific, Waltham, MA). Levels of IL-12 (G-  
12 Biosciences, St Louis, MO), GM-CSF (Mybiosource, San Diego, CA), and IFN- $\gamma$  (Mybiosource)  
13 in the tumor tissue extract were determined by ELISA according to instructions from the  
14 manufacturer. ELISA data were normalized relative to the total protein concentration in each  
15 tumor and were presented as picograms per milligram of total protein.

16

#### 17 *Immunohistochemical analysis*

18 For immunohistochemical analysis, tumor tissues were collected from hamsters at 7 days  
19 post initial Ad injection, embedded in paraffin, and sectioned at  $4 \mu\text{m}$  thickness. The tumor  
20 sections were blocked with Blocking Solution (DAKO) for 2 hr. The tumor sections were then  
21 incubated with a mouse anti-collagen type I Ab (Cell Signaling Technology, Beverly, MA), anti-  
22 collagen type III Ab (Sigma), or anti-E1A Ab (Santa Cruz biotechnology, Santa Cruz, CA) as  
23 primary Ab. After washing, the sections were incubated with the secondary Ab matching each

1 and then counterstained with Meyer's hematoxylin (Sigma). To identify lymphocyte infiltration  
2 into tumor tissues, tumor tissues from hamsters were frozen in OCT compound (Sakura Finetec,  
3 Torrance, CA) and cut into 5  $\mu\text{m}$  sections. Tumor sections were fixed with chilled acetone for 10  
4 min and blocked with Blocking Solution (DAKO). Sections were then incubated with primary  
5 Abs, mouse anti-rat CD4 monoclonal Ab (ebioscience, San Diego, CA) and mouse anti-rat CD8  
6 monoclonal Ab (ebioscience), at 4°C overnight. After washing three times with PBS, samples  
7 were incubated with the secondary Ab, goat anti-mouse IgG(H+L)-HRP (Southern biotech,  
8 Birmingham, AL) at room temperature for 2 hr. In the final step, the slides were washed with  
9 PBS, then counterstained with Meyer's hematoxylin (Sigma). The image was analyzed under a  
10 fluorescence microscope. The positive staining region was quantified with MetaMorph software.

1 **Graphical Abstract**

**Physical and immunological barriers of solid tumor**

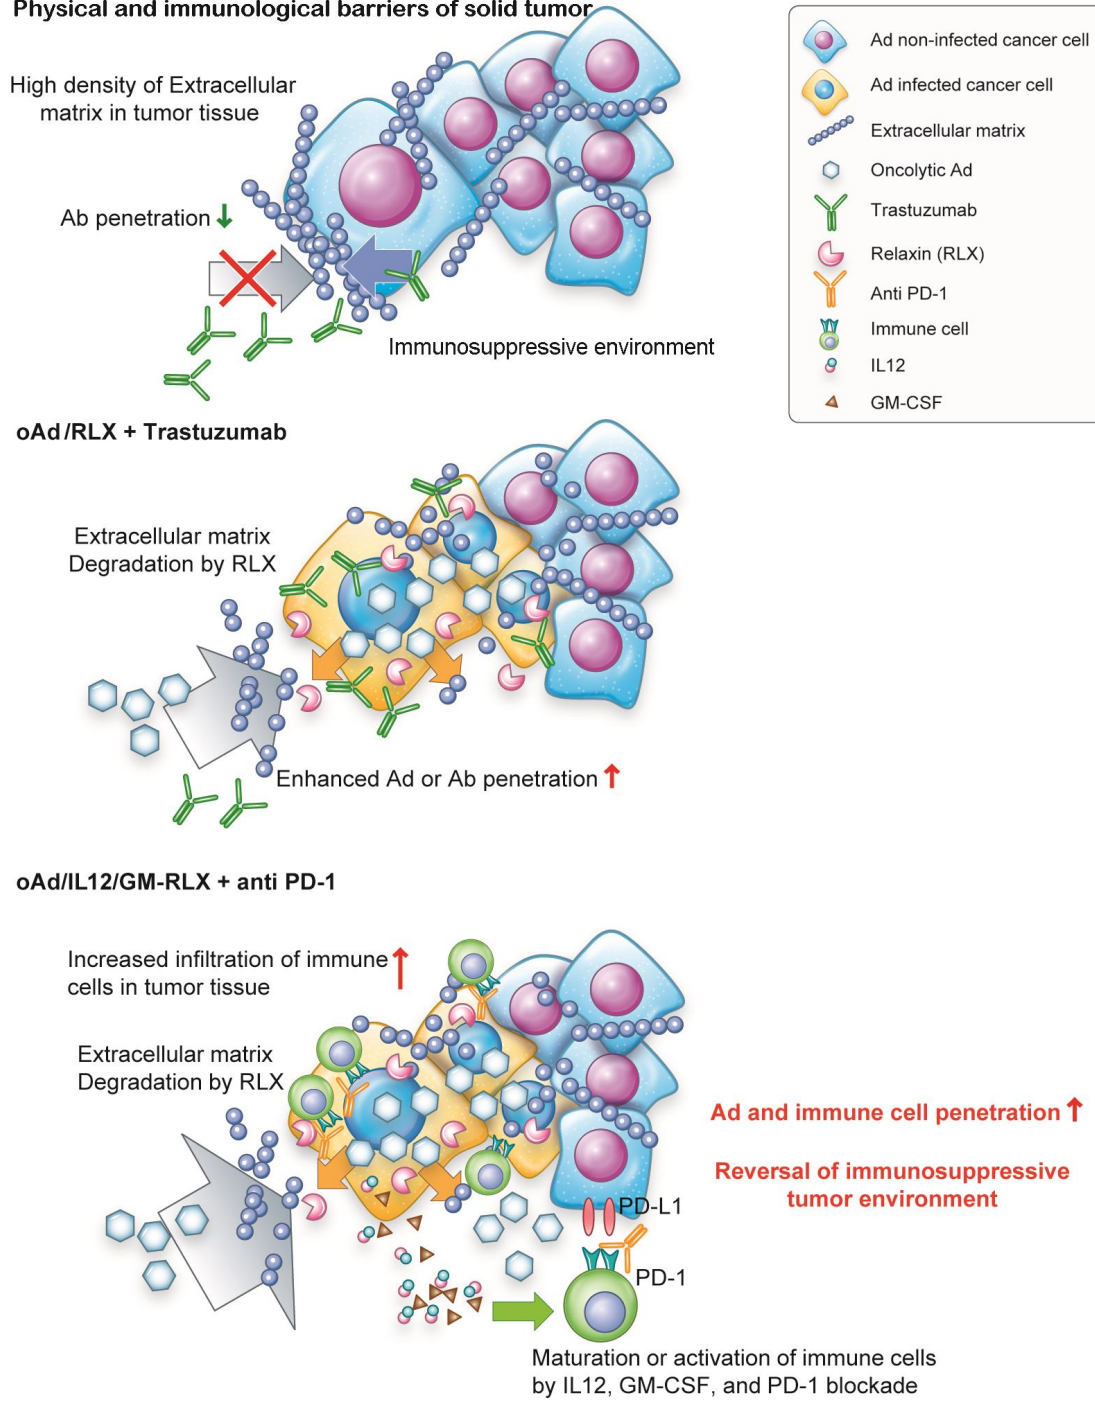

2

## Supplementary Figure 1

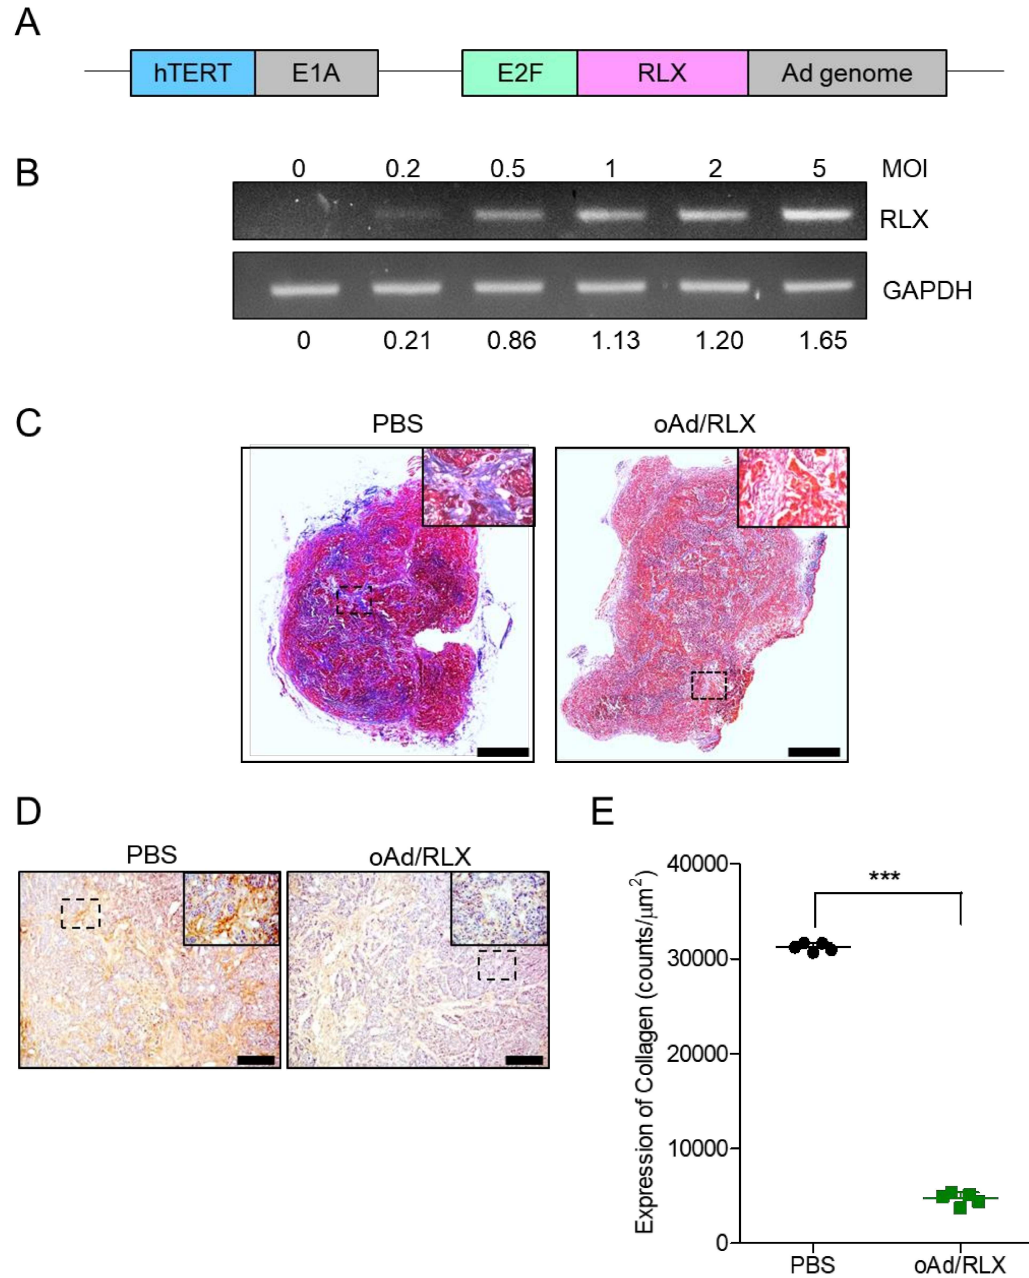

1

2

1 **Fig. S1. Characterization of oAd/RLX.** (A) Genome structure of oAd/RLX. (B) oAd/RLX-  
2 mediated RLX expression. NCI-N87 cells were treated with oAd/RLX at 0.2-5 MOI. The RLX  
3 gene expression level was determined by RT-PCR. (C) Masson's trichrome staining of PBS- or  
4 oAd/RLX- treated tumor tissue. The scale bar represents 1 mm. (D) Immunohistochemistry of  
5 collagen type I (brown) in NCI-N87 tumors treated with PBS or oAd/RLX. The scale bar  
6 represents 20  $\mu\text{m}$ . (E) Quantification of collagen type I expression from the  
7 immunohistochemistry image. Data are presented as mean  $\pm$  SD of five independent  
8 measurements; \*\*\* $P < 0.001$ .



## Supplementary Figure 2

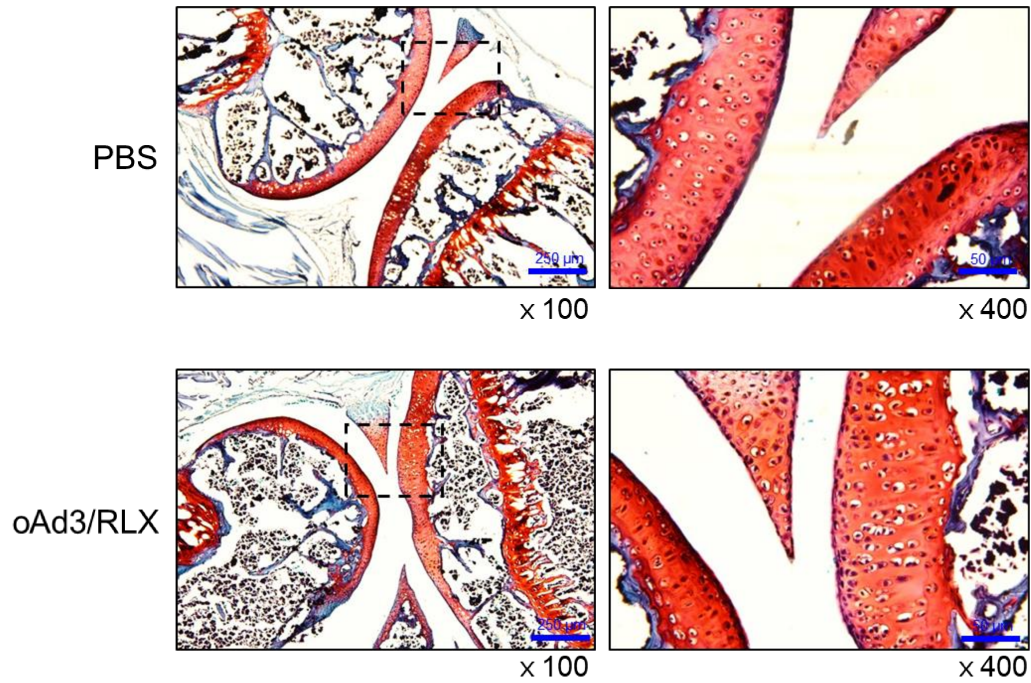

1

2

3 **Fig. S2. Histological analysis of articular cartilage in the knee joint.** Histological results of

4 Safranin-O staining of articular cartilage in the knee joint of PBS- or oAd/RLX-treated mice.

5 Original magnifications: ×100 or ×400. The scale bar represents 250 μm or 50 μm.

6

## Supplementary Figure 3

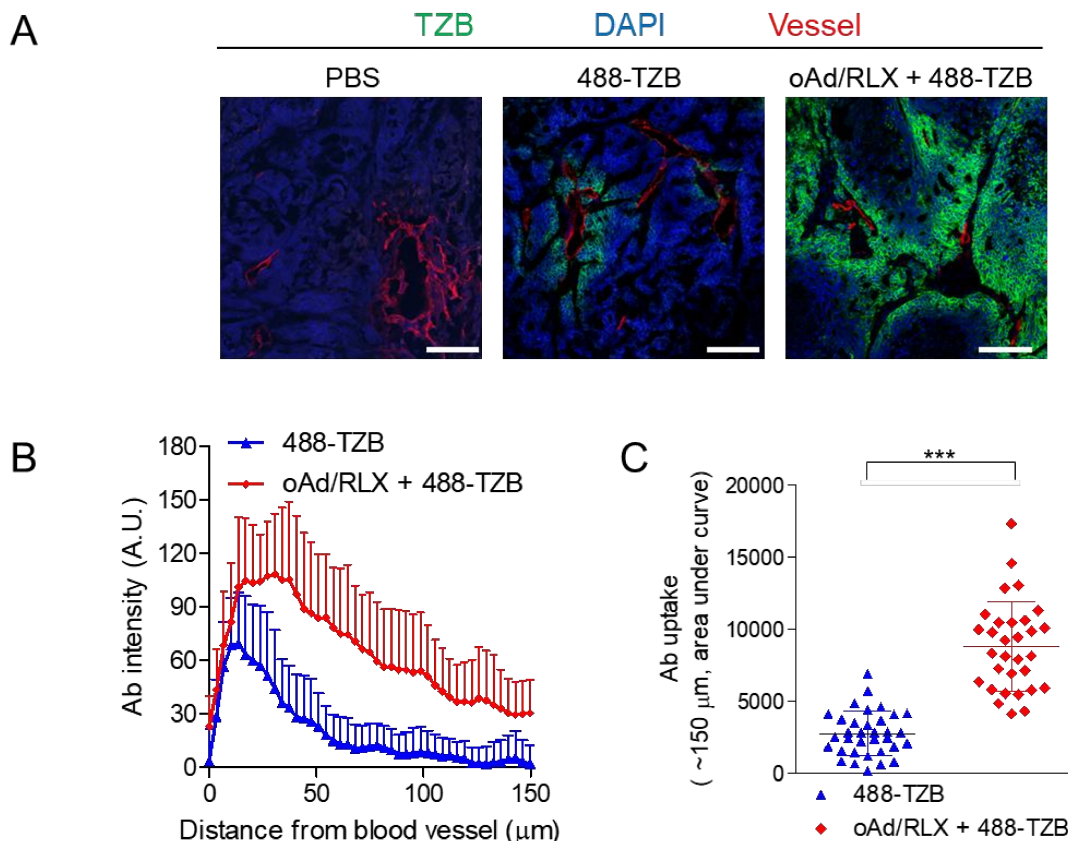

1

2 **Fig. S3. Quantification of penetrated TZB from the blood vessel in tumor tissues. (A)**3 Fluorescence images magnified from the white boxes labeled **β** in **Fig. 1A**. 488-TZB (green),

4 rhodamine-lectin positive functional blood vessels (red), and DAPI-stained nuclei (blue) are

5 shown for each group. Original magnification:  $\times 100$ . The scale bar represents 100  $\mu\text{m}$ . (B)6 Intensity profile of 488-TZB relative to the blood vessel (0-150  $\mu\text{m}$  from blood vessel). (C)7 Uptake of 488-TZB quantified by area under curve analysis (0-150  $\mu\text{m}$  from the blood vessel).8 Quantitative data are presented as mean optical density  $\pm$  SD (n=10); \*\*\* $P < 0.01$ .

9



## Supplementary Figure 4

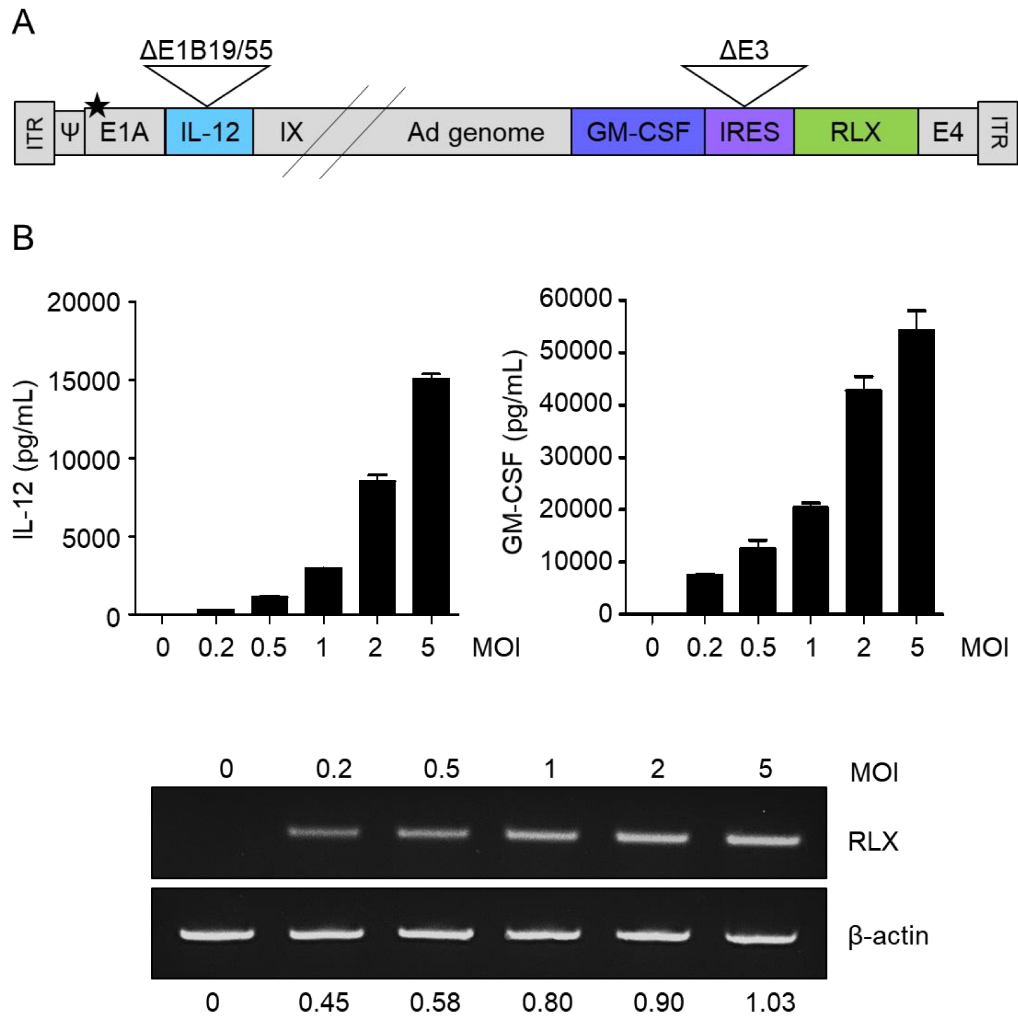

**Fig. S4. Characterization of oAd/IL12/GM-RLX.** (A) The oAd/IL12/GM-RLX construct. (B) Armed gene expression from oAd/IL12/GM-RLX. HaP-T1 cells were treated with oAd/IL12/GM-RLX at 0.2-5 MOI. Gene expression levels were determined by ELISA for IL-12 and GM-CSF or RT-PCR for RLX. Data are presented as mean  $\pm$  SD (n=3).

## Supplementary Figure 5

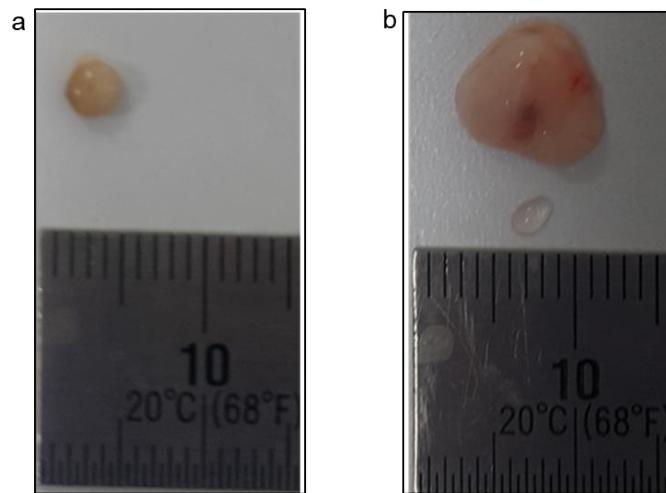

a :  $^{64}\text{Cu}$ - $\alpha\text{PD-1}$   
b : oAd/IL12/GM-RLX +  $^{64}\text{Cu}$ - $\alpha\text{PD-1}$

1

2 **Fig. S5. Representative photographs of DLNs.** Representative DLNs from hamsters treated  
3 with (a)  $^{64}\text{Cu}$ - $\alpha\text{PD-1}$  or (b) oAd/IL12/GM-RLX plus  $^{64}\text{Cu}$ - $\alpha\text{PD-1}$ . The DLN volume in the  
4 oAd/IL12/GM-RLX plus  $^{64}\text{Cu}$ - $\alpha\text{PD-1}$ -treated group was increased by 48-fold compared with  
5 that in the  $^{64}\text{Cu}$ - $\alpha\text{PD-1}$ -treated group

# Supplementary Figure 6

A

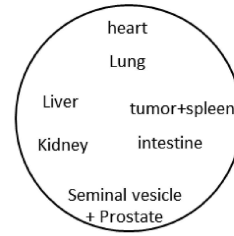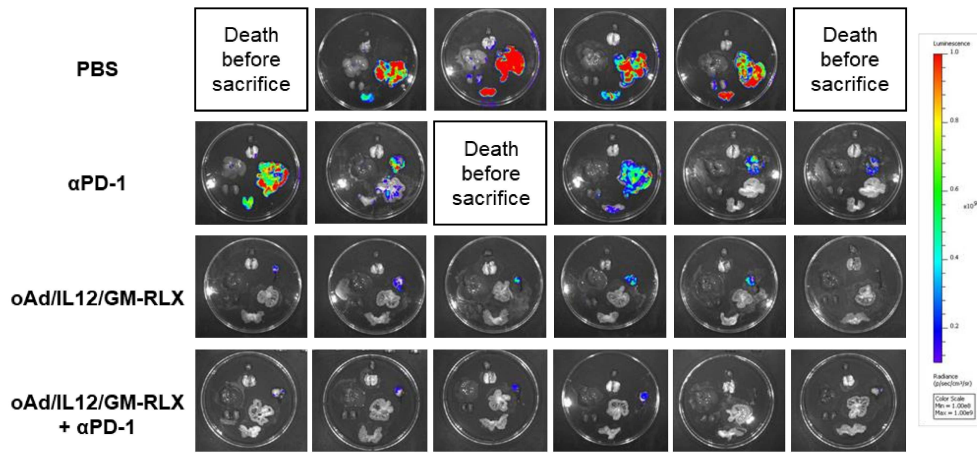

B

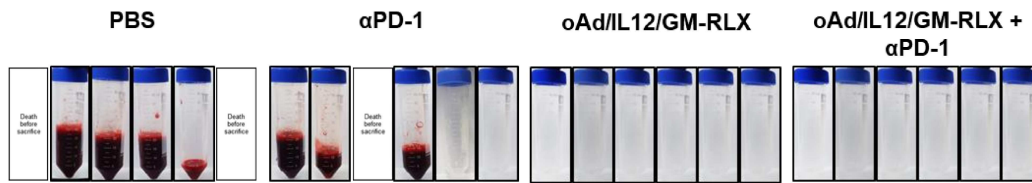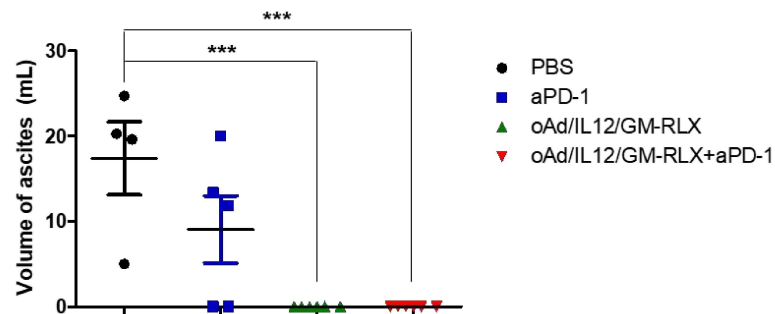

1

1 **Fig. S6. Inhibition of metastasis by combination therapy oAd/IL12/GM-RLX with  $\alpha$ PD-1 in**  
2 **hamster pancreatic orthotopic tumor model.** The hamsters with orthotopically established  
3 HP-1 pancreatic tumors were injected oAd/IL12/GM-RLX and/or  $\alpha$ PD-1 as described in **Fig. 4E**.  
4 (A) Individual Luciferase imaging in various organs (heart, lung, liver, kidney, spleen, intestine,  
5 seminal vesicle, and prostate) and tumor or (B) quantity of ascites of each treatment groups in  
6 luciferase-expressing HP-1 orthotopic pancreatic tumor model at 11 days post first treatment.

## Supplementary Figure 7

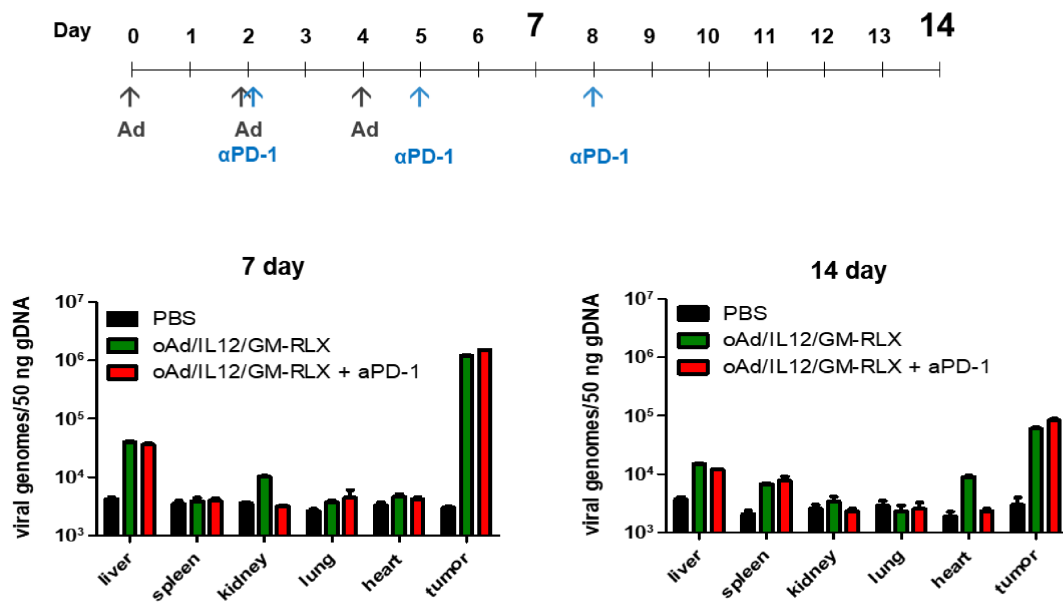

1  
2  
3 **Fig. S7. Biodistribution study.** HaP-T1 tumor-bearing hamsters were administered  
4 intratumorally with  $7 \times 10^7$  VP of oAd/IL12/GM-RLX three times (day 0, 2, 4) and/or  
5 intraperitoneally with 10 mg/kg of αPD-1 three times (day 2, 5, 8), along with PBS as control.  
6 The liver, spleen, kidney, lung, heart, and tumor tissues were harvested at 7- or 14-day post  
7 initial virus treatment, and Q-PCR was performed to detect the viral genomes. Data are presented  
8 as mean ± SD (n=3).

## Supplementary Figure 8

|                         | BUN<br>(mg/dL) | Creatinine<br>(mg/dL) | AST<br>(U/L) | ALT<br>(U/L) |
|-------------------------|----------------|-----------------------|--------------|--------------|
| PBS                     | 20.3±0.6       | ≤ 0.20                | 53±2.0       | 52.7±0.6     |
| αPD-1                   | 20.7±0.6       | ≤ 0.20                | 59.3±1.2     | 80.3±1.2     |
| oAd/IL12/GM-RLX         | 24.0±0.0       | ≤ 0.22                | 61.0±1.0     | 86.0±1.7     |
| oAd/IL12/GM-RLX + αPD-1 | 22.7±0.6       | ≤ 0.20                | 49.0±1.0     | 52.0±1.0     |

1

2

3 **Fig. S8. *In vivo* toxicity.** HaP-T1 tumor-bearing hamsters were administered intratumorally with  
4  $7 \times 10^7$  VP of oAd/IL12/GM-RLX three times (day 0, 2, 4) and/or intraperitoneally 10 mg/kg of  
5 three times (day 2, 5, 8), along with PBS as control. The BUN, creatinine, AST, and ALT levels  
6 in serum were measured at 72 hr after last treatment. Data are presented as mean ± SD (n=3).

7

### Supplementary Figure 9

**A**

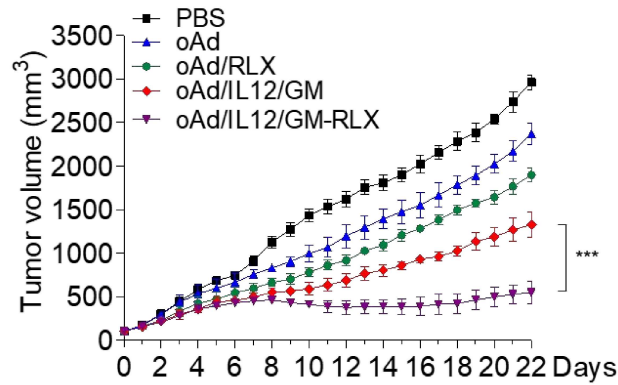

**B**

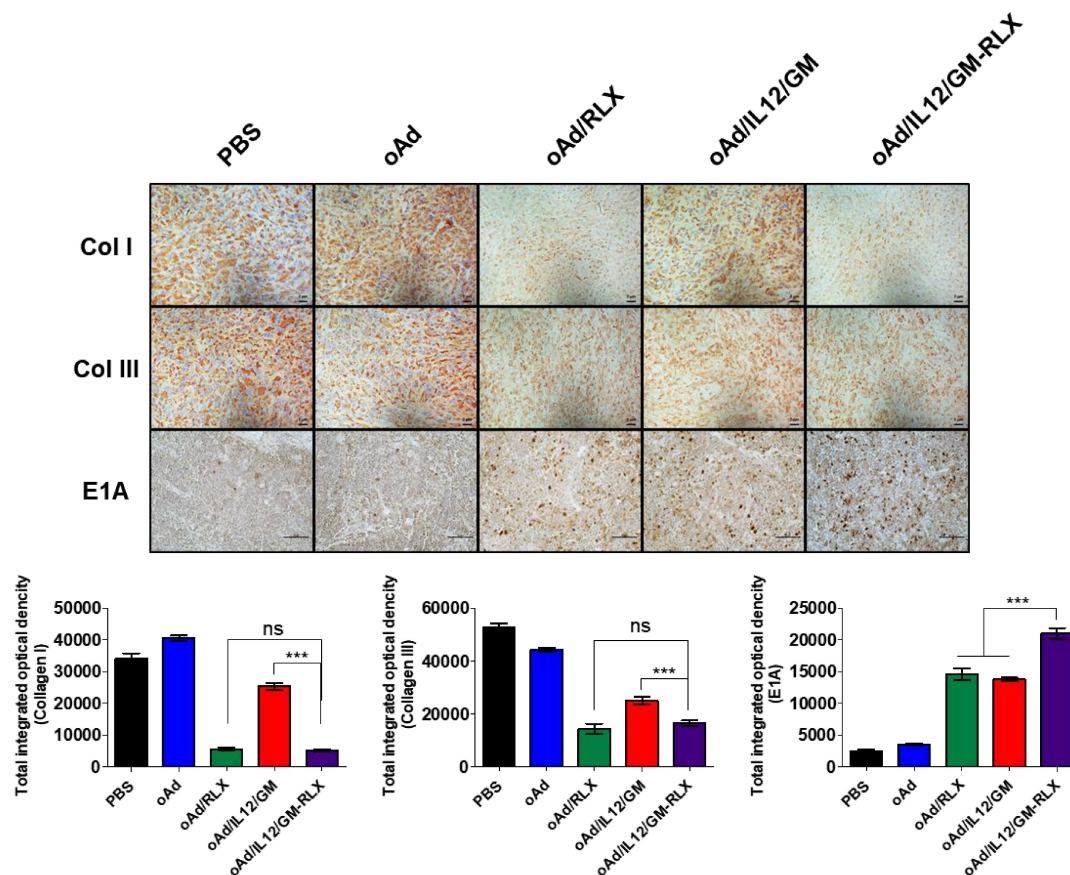

1

2

## Supplementary Figure 9

**C**

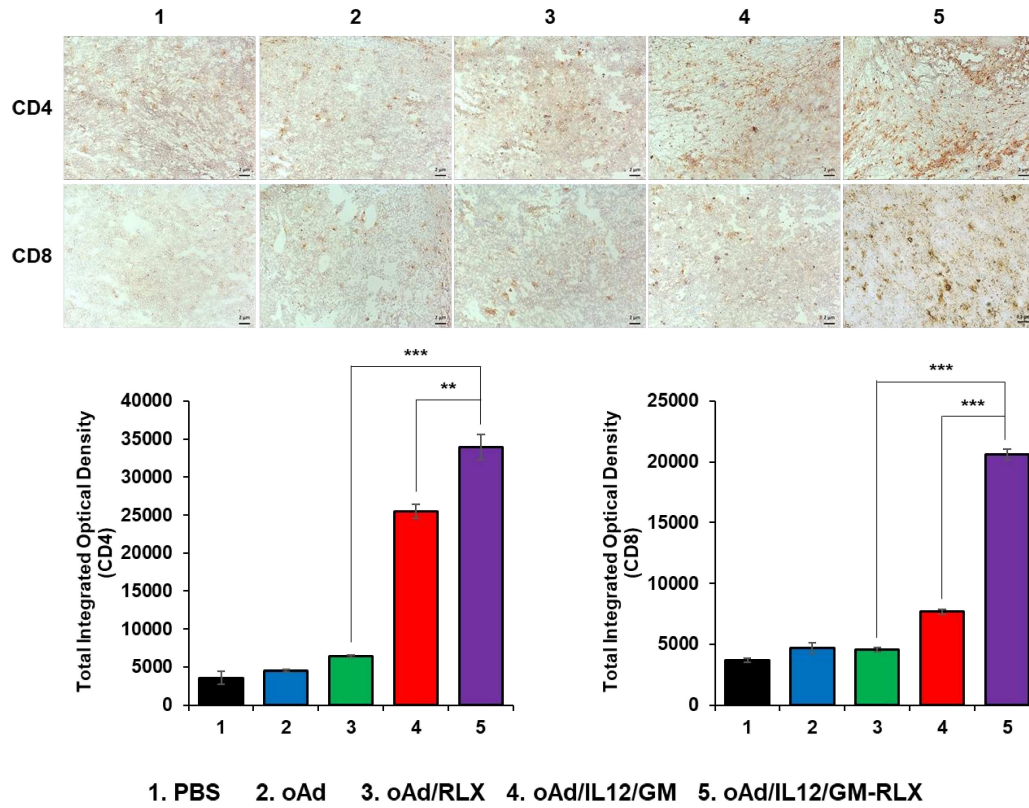

1

**D**

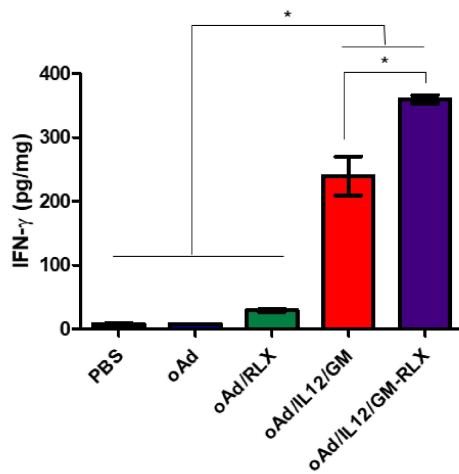

2



1 **Fig. S9. Comparison of therapeutic efficacy of oAd/RLX, oAd/IL12/GM, and**  
2 **oAd/IL12/GM-RLX.** Syrian hamsters were subcutaneously injected with HaP-T1 cells to  
3 establish pancreatic tumors. When the average tumor volume reached 90-100 mm<sup>3</sup>, the tumors  
4 were injected with  $1 \times 10^8$  VP of oAd, oAd/RLX, oAd/IL12/GM, and oAd/IL12/GM-RLX at day  
5 0, 2, and 4. (A) The average tumor growth curves of HaP-T1 tumor bearing hamsters after  
6 treatment. The tumor volume was measured every day until the end of the study. Data are  
7 presented as mean  $\pm$  SD (n=5); \*\*\* $P < 0.001$ . (B, C) Immunohistochemical analysis. Tumor  
8 tissues were collected on day 7 after the first virus injection and stained with collagen I, collagen  
9 III, adenovirus E1A, CD4, and CD8 Abs. The representative images were displayed. The scale  
10 bar represents 2  $\mu$ m (collagen I and collagen III, CD4 and CD8), or 50  $\mu$ m (E1A). The positive  
11 signal was quantified with MetaMorph software (n=3); \*\*\* $P < 0.001$  or \*\* $P < 0.01$  (D) IFN- $\gamma$   
12 expression in tumor tissues were analyzed by ELISA at 7 days post initial virus injection (n=3);  
13 \* $P < 0.05$ .

1 **Table S1. Dosimetry of  $^{64}\text{Cu}$ -TZB in tumors and organs**

| Organ or parameter         | $^{64}\text{Cu}$ -TZB<br>(n=4) | oAd/RLX<br>+ $^{64}\text{Cu}$ -TZB (n=6) |
|----------------------------|--------------------------------|------------------------------------------|
| Tumor                      | 755.962 ± 126.974              | 1068.911 ± 200.635                       |
| Adrenals                   | 0.013 ± 126.974                | 0.018 ± 0.0032                           |
| Brain                      | 0.033 ± 0.010                  | 0.036 ± 0.0115                           |
| Breasts                    | 0.006 ± 0.001                  | 0.009 ± 0.0018                           |
| Gallbladder wall           | 0.013 ± 0.002                  | 0.016 ± 0.0032                           |
| Lower large intestine wall | 0.005 ± 0.002                  | 0.004 ± 0.0007                           |
| Small intestine            | 0.006 ± 0.002                  | 0.006 ± 0.0014                           |
| Stomach wall               | 0.139 ± 0.038                  | 0.164 ± 0.0463                           |
| Upper large intestine wall | 0.006 ± 0.001                  | 0.007 ± 0.0012                           |
| Heart wall                 | 0.168 ± 0.024                  | 0.236 ± 0.0689                           |
| Kidneys                    | 0.010 ± 0.001                  | 0.012 ± 0.0020                           |
| Liver                      | 0.124 ± 0.002                  | 0.147 ± 0.0341                           |
| Lungs                      | 0.183 ± 0.011                  | 0.258 ± 0.0398                           |
| Muscle                     | 0.005 ± 0.001                  | 0.006 ± 0.0010                           |
| Ovaries                    | 0.007 ± 0.002                  | 0.005 ± 0.0024                           |
| Pancreas                   | 0.020 ± 0.002                  | 0.026 ± 0.0048                           |
| Red Marrow                 | 0.005 ± 0.002                  | 0.006 ± 0.0011                           |
| Osteogenic                 | 0.004 ± 0.042                  | 0.005 ± 0.0009                           |
| Skin                       | 0.002 ± 0.001                  | 0.003 ± 0.0005                           |
| Spleen                     | 0.502 ± 0.026                  | 0.714 ± 0.0873                           |
| Thymus                     | 0.011 ± 0.002                  | 0.015 ± 0.0035                           |
| Thyroid                    | 0.002 ± 0.019                  | 0.003 ± 0.0005                           |
| Urinary Bladder            | 0.255 ± 0.034                  | 0.191 ± 0.0891                           |
| Uterus                     | 0.294 ± 0.001                  | 0.169 ± 0.3622                           |
| Total body                 | 0.014 ± 0.002                  | 0.015 ± 0.005                            |
| ED Equivalent (mSv/MBq)    | 0.114 ± 0.032                  | 0.131 ± 0.022                            |
| ED (mSv/MBq)               | 0.075 ± 0.011                  | 0.090 ± 0.015                            |

2 **Table S1. Dosimetry of  $^{64}\text{Cu}$ -Trastuzumab in tumors and organs.**  $^{64}\text{Cu}$ -TZB was  
3 intravenously injected with/without oAd/RLX into NCI-N87 tumor-bearing mice. The absorbed  
4 dose of  $^{64}\text{Cu}$ -TZB to tumors and organs was measured at 40 hr post  $^{64}\text{Cu}$ -TZB treatment.

## 1 Reference

- 2 1. Kim J, Kim PH, Nam HY, Lee JS, Yun CO, Kim SW: **Linearized oncolytic adenoviral p**  
3 **lasmid DNA delivered by bioreducible polymers.** *J Control Release* 2012, **158**:451-460  
4 .
- 5 2. Choi KJ, Zhang SN, Choi IK, Kim JS, Yun CO: **Strengthening of antitumor immune m**  
6 **emory and prevention of thymic atrophy mediated by adenovirus expressing IL-12 a**  
7 **nd GM-CSF.** *Gene Ther* 2012, **19**:711-723.
- 8 3. Jung KH, Choi IK, Lee HS, Yan HH, Son MK, Ahn HM, Hong J, Yun CO, Hong SS: **Onc**  
9 **olytic adenovirus expressing relaxin (YDC002) enhances therapeutic efficacy of gem**  
10 **citabine against pancreatic cancer.** *Cancer Lett* 2017, **396**:155-166.
- 11 4. Kim JH, Lee YS, Kim H, Huang JH, Yoon AR, Yun CO: **Relaxin expression from tumo**  
12 **r-targeting adenoviruses and its intratumoral spread, apoptosis induction, and effi**  
13 **acy.** *J Natl Cancer Inst* 2006, **98**:1482-1493.
- 14 5. Choi KJ, Kim JH, Lee YS, Kim J, Suh BS, Kim H, Cho S, Sohn JH, Kim GE, Yun CO: **C**  
15 **oncurrent delivery of GM-CSF and B7-1 using an oncolytic adenovirus elicits potent**  
16 **antitumor effect.** *Gene Ther* 2006, **13**:1010-1020.
- 17 6. Lee YS, Kim JH, Choi KJ, Choi IK, Kim H, Cho S, Cho BC, Yun CO: **Enhanced antitu**  
18 **mor effect of oncolytic adenovirus expressing interleukin-12 and B7-1 in an immuno**  
19 **competent murine model.** *Clin Cancer Res* 2006, **12**:5859-5868.
